# Supplementary material for: Excellent performance of aromatic polyguanamines induced by multiple hydrogen bondable tetraazacalix[2]arene[2]-triazine ring in their main chain
Source: Royal Society of Chemistry journal article supplement (doi:10.1039/c9ra09136j), 2020-01-01
Supplement: c9ra09136j1.pdf [file c9ra09136j1.pdf]

## Supporting Information

# Excellent Performance of Aromatic Polyguanamines Induced by Multiple Hydrogen Bondable Tetraazacalix[2]arene[2]-triazine Ring in their Main Chain

*Haruki Sasaki,<sup>1</sup> Tomohiro Kotaki,<sup>1</sup> Atsuhiro Fujimori,<sup>2</sup> Tadashi Tsukamoto,<sup>1</sup> Eiichi Suzuki,<sup>1</sup>  
Yoshiyuki Oishi<sup>1</sup>, Yuji Shibasaki<sup>1\*</sup>*

<sup>1</sup>Department of Chemistry & Biological Sciences, Faculty of Science & Engineering, Iwate  
University, 4-3-5 Ueda, Morioka, Iwate 020-8551, Japan

<sup>2</sup>Graduate School of Science and Engineering, Saitama University, 255 Shimo-okubo, Sakura-ku,  
Saitama 338-8570, Japan

Caption to Figures

Figure S1.  $^1\text{H}$  NMR spectrum of  $m\text{PDA}_2\text{CyC}_2$  in  $\text{DMSO-}d_6$

Figure S2.  $^{13}\text{C}$  NMR spectrum of  $m\text{PDA}_2\text{CyC}_2$  in  $\text{DMSO-}d_6$

Figure S3. FAB MS spectrum of  $m\text{PDA}_2\text{CyC}_2$  (Found:  $m/z = 443.0062$  ( $\text{C}_{18}\text{H}_9\text{Cl}_2\text{N}_6\text{O}_4$ ) Err [ppm / mmu] = +2.0 / +0.9)

Figure S4.  $^1\text{H}$  NMR spectra of PG polymers in  $\text{DMSO-}d_6$

Figure S5. TMA profiles of  $c$ -PG polymer films

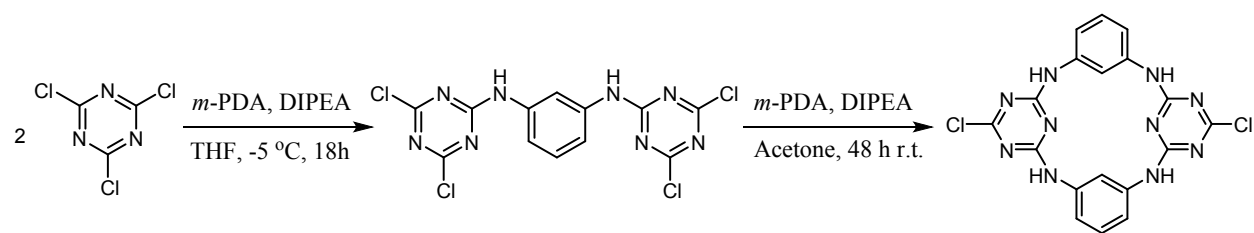

Scheme S1. Synthesis of *mPDA*<sub>2</sub>*CyC*<sub>2</sub>

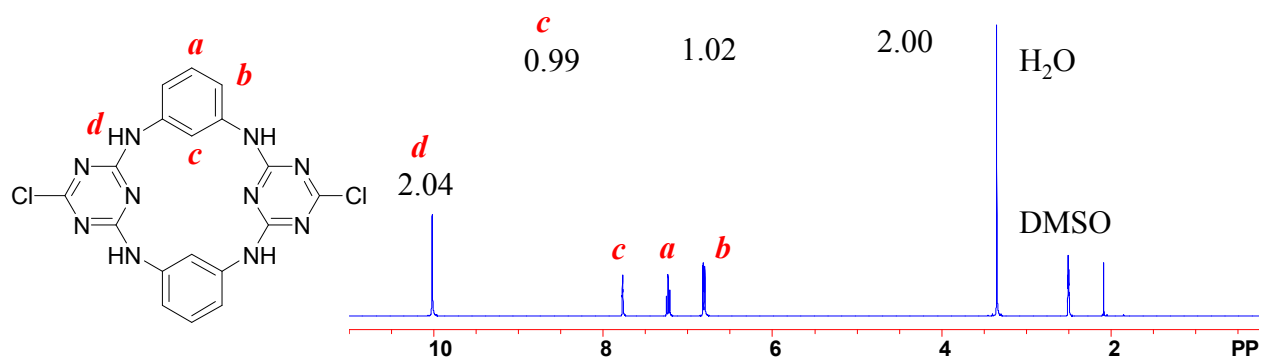

Figure 1S. <sup>1</sup>H NMR spectrum of *m*PDA<sub>2</sub>CyC<sub>2</sub> in DMSO-*d*<sub>6</sub>

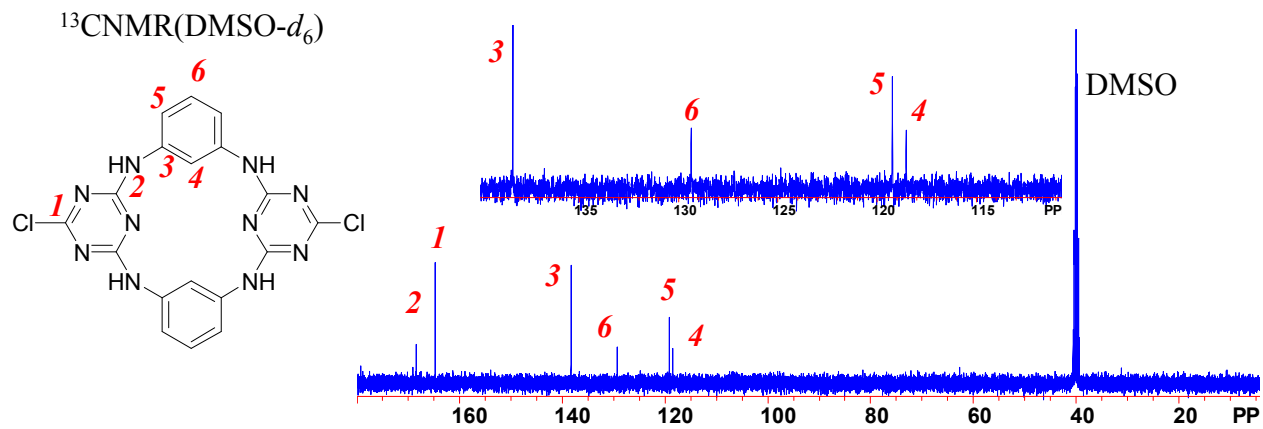

Figure 2S.  $^{13}\text{C}$  NMR spectrum of  $m\text{PDA}_2\text{CyC}_2$  in  $\text{DMSO-}d_6$

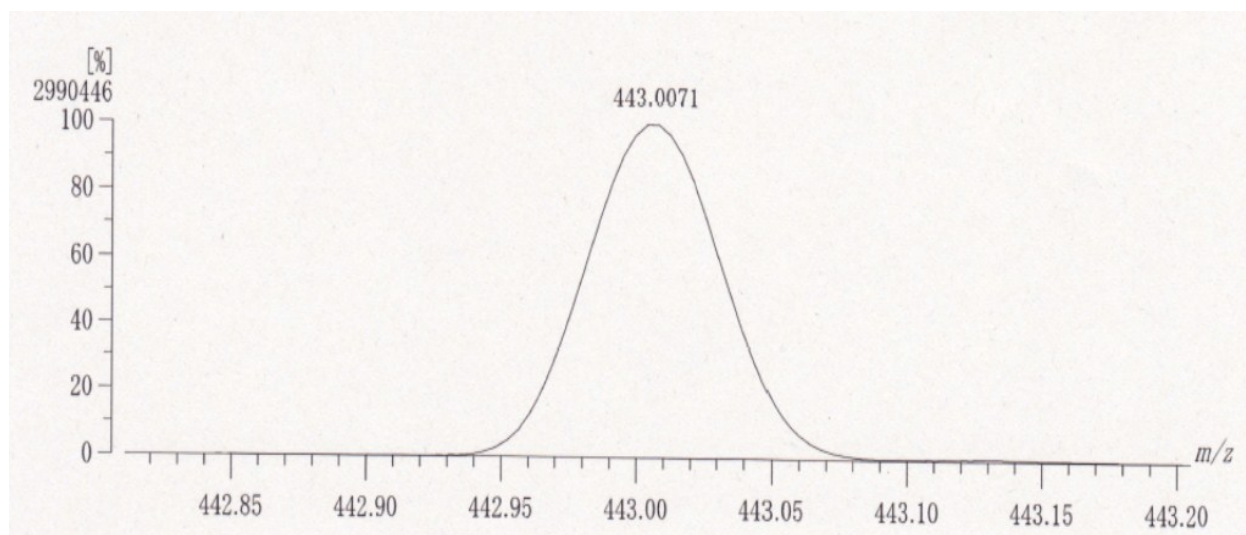

Figure 3S. FAB MS spectrum of  $mPDA_2CyC_2$  (Found:  $m/z = 443.0062$  ( $C_{18}H_9Cl_2N_6O_4$ ) Err [ppm / mmu] = +2.0 / +0.9)

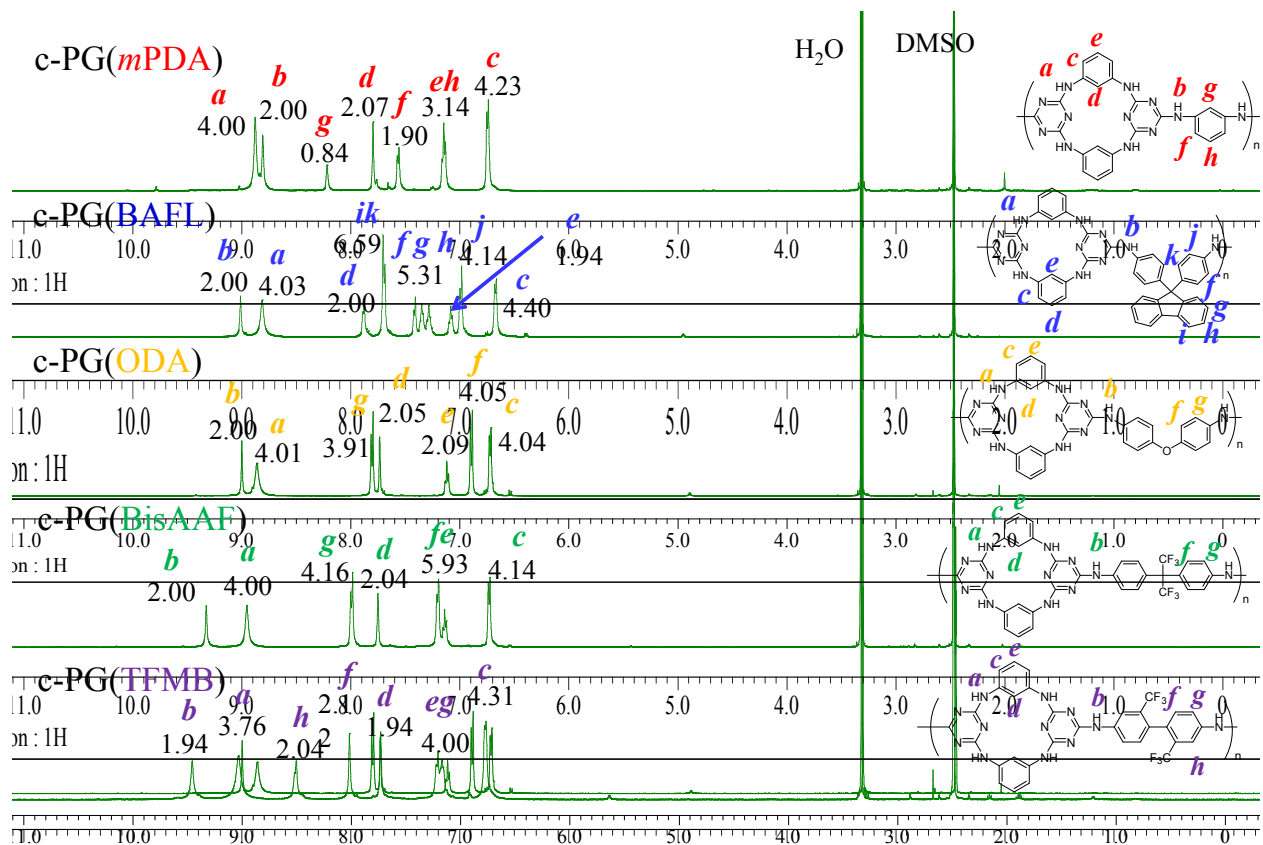

Figure 4S.  $^1\text{H}$  NMR spectra of PG polymers in  $\text{DMSO-}d_6$

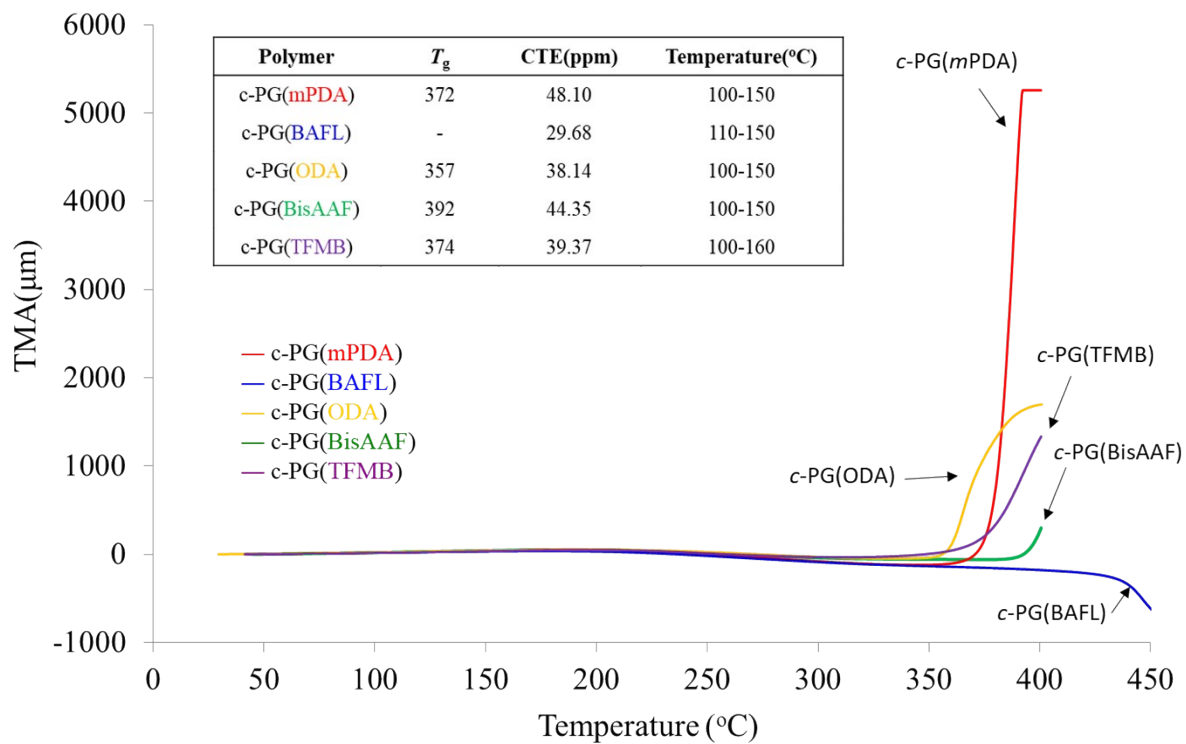

Figure 5S. TMA profiles of *c*-PG polymer films



Table 1s. Solubility of polymers

| Polymer             | DMF | DMAc | NMP | DMSO | THF | CHCl <sub>3</sub> | GBL | PGMEA | CHN |
|---------------------|-----|------|-----|------|-----|-------------------|-----|-------|-----|
| c-PG( <i>p</i> PDA) | ±   | ++   | ++  | ±    | -   | -                 | -   | -     | -   |
| c-PG( <i>m</i> PDA) | ++  | ++   | ++  | ++   | -   | -                 | -   | -     | -   |
| c-PG(BAFL)          | ++  | ++   | ++  | ++   | -   | -                 | -   | -     | -   |
| c-PG(ODA)           | ++  | ++   | ++  | ++   | -   | -                 | -   | -     | -   |
| c-PG(TFMB)          | ++  | ++   | ++  | ++   | ±   | -                 | -   | -     | -   |
| c-PG(BisAAF)        | ++  | ++   | ++  | ++   | -   | -                 | -   | -     | -   |

Polymer 10 mg / solvent 5 mL was used. ++ : soluble, ± : partially insoluble, - : insoluble.
